# Supplementary material for: Association between myosteatosis and survival of patients with esophageal and gastro-esophageal junction cancer: a meta-analysis
Source: PeerJ journal article supplement (doi:10.7717/peerj.20825), 2026-02-17
Supplement: Audience.docx [file Audience.docx]

This meta-analysis is intended for a specialized audience within the medical and oncology community, specifically:

1. Gastrointestinal Specialists: This group is the primary audience, particularly surgical oncologists and general surgeons specializing in the upper GI tract, and gastrointestinal medical oncologists who manage the treatment of esophageal cancer (EC) or gastro-esophageal junction cancer (GEC). The findings provide them with evidence that assessing muscle quality (myosteatosis) can be a valuable tool for prognostic stratification, helping to inform patient counseling and potentially guide more personalized treatment strategies.

2. Researchers in Cancer Cachexia and Body Composition: Scientists focused on the impact of sarcopenia, myosteatosis, and cancer cachexia on clinical outcomes will find this work highly relevant. It synthesizes the existing evidence and highlights the specific prognostic value of fat infiltration in muscle, distinct from mere muscle mass loss.

3. Nutritionists and Supportive Care Teams: Professionals responsible for the nutritional and metabolic support of cancer patients can use this information to identify a high-risk population (those with myosteatosis) who may benefit from more intensive nutritional interventions and physical prehabilitation programs aimed at improving muscle quality.

4. Radiologists: The study underscores the clinical importance of body composition analysis derived from routine CT scans. It is particularly relevant for radiologists who can quantify myosteatosis and help integrate this prognostic factor into standard radiological reporting.

In summary, the audience consists of gastrointestinal clinicians and researchers who manage, treat, or investigate upper gastrointestinal cancers and are interested in improving prognostic accuracy and patient outcomes through body composition analysis.
