# Supplementary material for: Association between myosteatosis and survival of patients with esophageal and gastro-esophageal junction cancer: a meta-analysis
Source: PeerJ journal article supplement (doi:10.7717/peerj.20825), 2026-02-17
Supplement: Data.xlsx [file Data.xlsx]

## Sheet: Sheet1
Study	Location	Study design	Diagnosis	Sample size	Mean age (years)	Men (%)	Cancer stage	Main treatment	Methods and parameter for myosteatosis evaluation	Cutoff values of myosteatosis parameters	No. of patients with myosteatosis	Median follow-up duration (months)	Survival outcomes reported	Covariates adjusted
Tamandl 2016	Austria	RC	EC and GEC	200	63.9	75.5	I-III	Surgery with or without neoadjuvant chemotherapy	CT, L3, MA	MA ≤ 40 HU	NR	35.1	OS	None
Gabiatti 2019	Brazil	RC	Locally advanced EC	123	59.3	87.7	II-III	Definitive chemoradiotherapy	CT, L3, MA	MA <41 HU (BMI <25 kg/m2) or MA <33 HU (BMI ≥25 kg/m2)	72	10.1	OS and PFS	Age, weight loss, BMI, and ECOG PS
Dijksterhuis 2019	The Netherlands	RC	Advanced EC and GEC	88	63	75	IV	Palliative chemotherapy	CT, L3, MA	MA <41 HU (BMI <25 kg/m2) or <33 HU (BMI ≥25)	44	10.1	OS and PFS	Age, sex, WHO performance status, metastatic sites, histology
Zhou 2020	USA	RC	EC	59	61.7	86.4	I-IV	Chemotherapy, radiotherapy, and surgery	CT, L4, MA	MA ≤ 47.9 HU (median)	29	15	OS	Age, BMI, diabetes, and in-hospital status
Srpcic 2020	Slovenia	PC	EC and GEC	139	63.9	84.2	I-IV	Surgery with or without neoadjuvant chemoradiotherapy	CT, L3, MA	MA < 30.9 HU (men), < 24.8 HU (women)	72	18.1	OS	None
West 2021	UK	PC	EC and GEC	100	67	72	I-IV	Surgical resection and neoadjuvant therapy	CT, L3, MA	MA <41 HU (BMI <25 kg/m2) or MA <33 HU (BMI ≥25 kg/m2)	36	24	OS	Age, pathological stage, type of surgery, resection margin status
Kitajima 2023	Japan	RC	EC	150	69	84.7	I-IV	Surgery with or without neoadjuvant therapy	CT, L4, mIMAC	Men: mIMAC ≤138.06; Women: mIMAC ≤112.92	80	30	OS and PFS	Age, sex, neoadjuvant therapy, tumor size, T classification, vessel invasion, lymphovascular invasion, lymph node metastasis, distant metastasis
Ito 2023	Japan	RC	EC	100	65	84	II-III	Surgery and neoadjuvant chemotherapy	CT, L3, IMAC	Men: IMAC > −0.375; Women: IMAC > −0.216	23	72	OS	Age, sex, BMI, PNI, PMI, ASA-PS score, tumor stage
Ichinohe 2023	Japan	RC	EC	131	64	91.6	II-III	Surgery and neoadjuvant chemotherapy	CT, L3, IMAC	IMAC ≥ −0.36	17	60.9	OS and PFS	Age, BMI,tumor stage, and PMI
Park 2024	Australia	RC	EC and GEC	462	67	78.4	I-IV	Surgery and neoadjuvant chemoradiotherapy	CT, L3, MA	MA <41 HU (BMI <25 kg/m2) or MA <33 HU (BMI ≥25 kg/m2)	353	30	OS and PFS	None
Yang 2024	China	RC	EC	258	62.8	79.8	I-IV	Radiotherapy	CT, L3, MA	MA <30.9 HU (men), MA <24.8 HU (women)	104	54.6	OS	Age, tumor length, TNM stage, SMI, and BMI

## Sheet: Sheet2
Study	Representativeness of the exposed cohort	Selection of the non exposed cohort	Ascertainment of exposure	Outcome not present at baseline	Control for age	Control for other confounding factors	Assessment of outcome	Enough long follow-up duration	Adequacy of follow-up of cohorts	Total	24 months
Tamandl 2016	1	1	1	1	0	0	1	1	1	7
Gabiatti 2019	1	1	1	1	1	1	1	0	1	8
Dijksterhuis 2019	1	1	1	1	1	1	1	0	1	8
Zhou 2020	1	1	1	1	1	1	1	0	1	8
Srpcic 2020	1	1	1	1	0	0	1	0	1	6
West 2021	1	1	1	1	1	1	1	1	1	9
Kitajima 2023	1	1	1	1	1	1	1	1	1	9
Ito 2023	1	1	1	1	1	1	1	1	1	9
Ichinohe 2023	1	1	1	1	1	1	1	1	1	9
Park 2024	1	1	1	1	0	0	1	1	1	9
Yang 2024	1	1	1	1	1	1	1	1	1	9

## Sheet: Sheet3
OS	HR	LL	UL	lnHR	SE		PFS	HR	LL	UL	lnHR	SE
Tamandl 2016	1.91	1.12	3.28	0.647103	0.274111		Gabiatti 2019	0.53	0.34	0.83	-0.634878	0.227673
Gabiatti 2019	0.57	0.36	0.91	-0.562119	0.236566		Dijksterhuis 2019	1.05	0.64	1.73	0.0487902	0.253676
Dijksterhuis 2019	1.4	0.85	2.31	0.336472	0.255042		Kitajima 2023	3.9	1.62	10.9	1.36098	0.48631
Zhou 2020	1.94	1.11	3.21	0.662688	0.270896		Ichinohe 2023	2.28	1.15	4.52	0.824175	0.349171
Srpcic 2020	1.54	1.01	2.35	0.431782	0.215425		Park 2024	1.2	0.92	1.56	0.182322	0.134711
West 2021	1	0.9	1.11	0	0.0535001
Kitajima 2023	2.1	1.01	4.6	0.741937	0.386762
Ito 2023	2.7	1.34	5.42	0.993252	0.356486
Ichinohe 2023	2.09	1.04	4.21	0.737164	0.356694
Park 2024	1.13	0.81	1.58	0.122218	0.170445
Yang 2024	2.03	1.26	3.27	0.708036	0.243285
